# Supplementary material for: Vaccine-elicited memory CD4+ T cell expansion is impaired in the lungs during tuberculosis
Source: PubMed Central journal article supplement (PMC5720822; doi:10.1371/journal.ppat.1006704), 2017-11-27
Supplement: ppat.1006704.s001.pdf [file ppat.1006704.s001.pdf]

## Supplemental data 1.

| Sample name | Productive frequency | Amino acid                | CDR3 $\beta$ length | V gene     | J gene     |
|-------------|----------------------|---------------------------|---------------------|------------|------------|
| Ag85b_w4L1  | 20.2                 | CGARVTNSDYTF              | 12                  | TCRBV20-01 | TCRBJ01-02 |
| Ag85b_w4L2  | 17.5                 | CASSLEAETLYF              | 12                  | TCRBV16-01 | TCRBJ02-03 |
| Ag85b_w4L3  | 13.1                 | CASSLAANSDYTF             | 13                  | TCRBV03-01 | TCRBJ01-02 |
| Ag85b_w4L4  | 10.6                 | CASSLEFSNERLFF            | 42                  | TCRBV16-01 | TCRBJ01-04 |
| Ag85b_w4L5  | 17.9                 | CASS <b>LEG</b> DQYF      | 14                  | TCRBV16-01 | TCRBJ02-05 |
| Ag85b_10w1  | 7.3                  | CASS <b>LEG</b> YEQYF     | 12                  | TCRBV16-01 | TCRBJ02-07 |
| Ag85b_10w2  | 19.1                 | CASS <b>LEG</b> NSDYTF    | 13                  | TCRBV16-01 | TCRBJ01-02 |
| Ag85b_10w3  | 14.9                 | CASSLEFSNERLFF            | 14                  | TCRBV16-01 | TCRBJ01-04 |
| ESAT6_w4L1  | 80.7                 | CASSPTVNNQAPLF            | 14                  | TCRBV26-01 | TCRBJ01-05 |
| ESAT6_w4L2  | 70.5                 | CASSRT <b>GG</b> YAETLYF  | 15                  | TCRBV26-01 | TCRBJ02-03 |
| ESAT6_w4L3  | 24.5                 | CASSIAGTKGAEQFF           | 15                  | TCRBV19-01 | TCRBJ02-01 |
| ESAT6_w4L4  | 51.3                 | CASSLST <b>GG</b> PSDYTF  | 15                  | TCRBV26-01 | TCRBJ01-02 |
| ESAT6_w5L5  | 14.2                 | CASS <b>GGG</b> NTRYF     | 12                  | TCRBV13-01 | TCRBJ02-04 |
| ESAT6_10w1  | 52.3                 | CASSLWT <b>GG</b> KQNTLYF | 16                  | TCRBV03-01 | TCRBJ02-04 |
| ESAT6_10w2  | 31.7                 | CASGVTT <b>GG</b> AEQFF   | 14                  | TCRBV13-02 | TCRBJ02-01 |
| ESAT6_10w3  | 43.6                 | CASKR <b>GG</b> SSAETLYF  | 15                  | TCRBV02-01 | TCRBJ02-03 |
| ESAT6_10w4  | 46.1                 | CASSPSNSGNTLYF            | 14                  | TCRBV19-01 | TCRBJ01-03 |
| ESAT6_10w5  | 57.3                 | CASSPHGQYSGNTLYF          | 16                  | TCRBV05-01 | TCRBJ01-03 |

The most abundant TCR from each sample of tetramer<sup>+</sup> Ag8b-specific CD4 T cells (n=8) and ESAT6-specific CD4 T cells (n=10) is listed here and was used to generate Fig.2. The CDR3 $\beta$  amino sequence, the CDR3 $\beta$  length, TRBV and TRBJ gene segment usage is shown. The “LEG” motif (which is detected in Ag8b-specific CD4 T cells) and “GG/TGG/GGG” motif (which is detected in ESAT6-specific CD4 T cells) is bolded. These motifs are described in the text and in Figure 2.
