# Supplementary material for: Vaccine-elicited memory CD4+ T cell expansion is impaired in the lungs during tuberculosis
Source: PubMed Central journal article supplement (PMC5720822; doi:10.1371/journal.ppat.1006704), 2017-11-27
Supplement: ppat.1006704.s003.pdf [file ppat.1006704.s003.pdf]

## Supplemental Data 3

### A. Description of transgenic TCRs

|                       | <b>P25</b>     | <b>P25-related</b> | <b>C7 TCR</b>   | <b>C7-related</b> |
|-----------------------|----------------|--------------------|-----------------|-------------------|
| Specificity           | Ag85b          | Ag85b              | ESAT6           | ESAT6             |
| CDR3 $\beta$ sequence | CASSFESSAETLYF | CASSLESSAETLYF     | CASSYWGGGQNTLYF | CASSSWGGGQNTLYF   |
| TRBV                  | TCRBV16-01     | TCRBV16-01         | TCRBV04-01      | TCRBV04-01        |
| TRBJ                  | TCRBJ02-03     | TCRBJ02-03         | TCRBJ02-04      | TCRBJ02-04        |
| CDR3 $\beta$ length   | 14             | 14                 | 15              | 15                |

### B. Detection of P25 TCR and related sequence in polyclonal response to Ag85b.

| Sample     | <b>P25</b> | <b>P25-related</b> | <b>TRBV16</b> | <b>TRBJ2-3</b> | <b>TRBJ2-7</b> |
|------------|------------|--------------------|---------------|----------------|----------------|
| Ag85b_10w1 | None       | 0.12%              | 31.7%         | 3.0%           | 30.7%          |
| Ag85b_10w2 | None       | None               | 34.7%         | 3.6%           | 29.3%          |
| Ag85b_10w3 | None       | None               | 39.0%         | 4.6%           | 15.9%          |
| Ag85b_w4L1 | None       | None               | 36.6%         | 11.6%          | 11.5%          |
| Ag85b_w4L2 | None       | None               | 49.1%         | 27.4%          | 29.9%          |
| Ag85b_w4L3 | None       | None               | 35.2%         | None           | 17.9%          |
| Ag85b_w4L4 | None       | None               | 59.8%         | 9.4%           | 30.1%          |
| Ag85b_w4L5 | None       | 4.73%              | 58.2%         | 7.9%           | 28.8%          |

### C. Detection of C7 TCR and related sequence in polyclonal response to ESAT6.

| Sample     | <b>C7 TCR</b> |       | <b>C7-related</b> |       |
|------------|---------------|-------|-------------------|-------|
|            | frequency     | Count | Row Labels        | Count |
| ESAT6_10w1 | 0.0368%       | 1     | None              | 0     |
| ESAT6_10w2 | None          | 0     | None              | 0     |
| ESAT6_10w3 | 0.0687%       | 1     | None              | 0     |
| ESAT6_10w4 | 0.0119%       | 1     | 0.229%            | 1     |
| ESAT6_10w5 | None          | 0     | None              | 0     |
| ESAT6_w4L1 | None          | 0     | None              | 0     |
| ESAT6_w4L2 | None          | 0     | None              | 0     |
| ESAT6_w4L3 | None          | 0     | None              | 0     |
| ESAT6_w4L4 | None          | 0     | 3.665%            | 1     |
| ESAT6_w4L5 | None          | 0     | None              | 0     |

A. The transgenic TCRs used in this study. The P25-related and C7-related TCRs were closely related sequences detected in Mtb-infected mice, which had similar gene segment usage as P25 and C7, and closely related CDR3 $\beta$  sequences. P25 does not contain the 'LEG' motif that we frequently detected in Ag85b-specific CD4 T cells. C7 contains the 'GGG' motif that we observed in ESAT6-specific CD4 T cells.

B. The frequency of the P25 and P25-related CDR3 $\beta$  sequence in the tetramer<sup>+</sup>Ag85b-specific CD4 T cells. Also listed are the frequency of TRBV16, TRBJ2-3, and TRBJ2-7, which are frequently used by Ag85b-specific CD4 T cells. Note that the P25 CDR3 $\beta$  amino acid sequence was not detected in any of our samples.

C. The frequency of the C7 and C7-related CDR3 $\beta$  amino acid sequence and number of unique clonotypes (based on DNA sequence) among the tetramer<sup>+</sup>ESAT6-specific CD4 T cells sequenced.
