# Supplementary material for: Vaccine-elicited memory CD4+ T cell expansion is impaired in the lungs during tuberculosis
Source: PubMed Central journal article supplement (PMC5720822; doi:10.1371/journal.ppat.1006704), 2017-11-27
Supplement: ppat.1006704.s005.pdf [file ppat.1006704.s005.pdf]

## Supplemental Data 5.

### 1) C7 TCR sequence

| IMGT analysis:    | TRA rearranged sequence | TRB rearranged sequence |
|-------------------|-------------------------|-------------------------|
| V-GENE and allele | Musmus TRAV4D-4*02 (F)  | Musmus TRBV4*01 F       |
| D-GENE and allele | N/A                     | Musmus TRBD2*01 F       |
| J-GENE and allele | Musmus TRAJ34*02 F      | Musmus TRBJ2-4*01 F     |
| AA JUNCTION       | CAAGNTNKVVF             | CASSYWGGGQNTLYF         |

#### 1a) C7 TCRalpha sequence

ATGCAGAGGAACCTGGGAGCTGTGCTGGGGATTCTGTGGGTGCAGATTTGCTGGGTGAGAGGAGATCAGGTGGA  
GCAGAGTCCTTCAGCCCTGAGCCTCCACGAGGGAAACCGTTCTGCTCTGAGATGCAATTTTACGACCACCATGA  
GGGCTGTGCAGTGGTTCCAACAGAACTCCAGGGGGCAGCCTCATCAATCTGTTCTACTTGGCTTCAGGAACAAAG  
GAGAATGGGAGGTTAAAGTCAACATTCAATTTCTAAGGAGAGCTACAGCACCTGCACATCAGGGATGCCAGCT  
GGAGGACTCAGGCACTTACTTCTGTGCTGCTGGGAATACCAACAAAGTCGTCCTTTGGAACAGGGACCAGATTAC  
AAGTATTACCAAACATCCAGAATCCGGAACCTGCTGTGTACCAGTTAAAAGATCCTCGGTCTCAGGACAGCACC  
CTCTGCCTGTTACCCGACTTTGACTCCCAAATCAATGTGCCGAAAACCATGGAATCTGGAACGTTTCACTACTGA  
CAAACTGTGCTGGACATGAAAAGCTATGGATTCCAAGAGCAATGGGGCCATTGCCTGGAGCAACCAGACAAGCT  
TCACCTGCCAAGATATCTTCAAAGAGACCAACGCCACCTACCCAGTTCAGACGTTCCCTGTGATGCCACGTTG  
ACTGAGAAAAGCTTTGAAACAGATATGAACCTAAACTTTCAAACCTGTCAGTTATGGGACTCCGAATCCTCCT  
GCTGAAAGTAGCCGGATTTAACCTGCTCATGACGCTGAGGCTGTGGTCC

#### 1b) C7 TCRbeta sequence

ATGGGCTGTAGGCTCCTAAGCTGTGTGGCCTTCTGCCTCTTGGGAATAGGCCCTTTGGAGACGGCTGTTTTCCA  
GACTCCAAACTATCATGTACACAGGTGGGAAATGAAGTGTCTTTCAATTGTAAGCAAACCTCTGGGCCACGATA  
CTATGTATTGGTACAAGCAAGACTCTAAGAAATGCTGAAGATTATGTTTAGCTACAATAATAAGCAAACCTCATT  
GTAAACGAAACAGTTCCAAGGCGTTCTCACCTCAGTCTTCAGATAAAGCTCATTTGAATCTTCGAATCAAGTC  
TGTAGAGCCGGAGGACTCTGCTGTGTATCTCTGTGCCAGCAGCTATTGGGGGGGCGGTCAAACACCTTGTACT  
TTGGTGCGGGCACCCGACTATCGGTGCTAGAAGATCTGAGAAATGTGACTCCACCCAAGGTCTCCTTGTGTTGAG  
CCATCAAAGCAGAGATTGCAAACAAACAAAAGGCTACCCTCGTGTGCTTGGCCAGGGGCTTCTTCCCTGACCA  
CGTGGAGCTGAGCTGGTGGGTGAATGGCAAGGAGGTCCACAGTGGGGTCAGCACGGACCCTCAGGCCTACAAGG  
AGAGCAATTATAGCTACTGCCTGAGCAGCCGCTGAGGGTCTCTGCTACCTTCTGGCACAATCCTCGAAACCAC  
TTCCGCTGCCAAGTGCAGTTCCATGGGCTTTCAGAGGAGGACAAGTGGCCAGAGGGCTCACCCAAACCTGTCAC  
ACAGAACATCAGTGCAGAGGCTGGGGCCGAGCAGACTGTGGAATCACTTCAGCATCCTATCATCAGGGGGTTC  
TGTCTGCAACCATCCTCTATGAGATCCTACTGGGGAAGGCCACCCTATATGCTGTGCTGGTCAGTGGCCTGGTG  
CTGATGGCCATGGTCAAGAAAAAAAATTCCTGA

### 2) P25 TCR sequence

| IMGT analysis:    | TRA rearranged sequence | TRB rearranged sequence |
|-------------------|-------------------------|-------------------------|
| V-GENE and allele | Musmus TRAV3D-3*02 F    | Musmus TRBV16*01 F      |
| D-GENE and allele | N/A                     | Musmus TRBD1*01 F       |
| J-GENE and allele | Musmus TRAJ18*01 F      | Musmus TRBJ2-3*01 F     |
| AA JUNCTION       | CAVSGGSALGRLHF          | CASSFESSAETLYF          |

#### 2a) P25 TCRalpha sequence

ATGAAGACAGTGACTGGACCTTTGTTCCCTGTGCTTCTGGCTGCAGCTGAACTGTGTGAGCAGAGGCGAGCAGGT  
GGAGCAGCGCCCTCCTCACCTGAGTGTCCGGGAGGGAGACAGTGCCGTTATCATCTGCACCTACACAGACCCTA  
ACAGTTATTACTTCTTCTGGTACAAGCAAGAGCCGGGGGAGGTTCTCAGTTGCTTATGAAGGTTTTCTCAAGT  
ACGGAAATAAACGAAGGACAAGGATTCAGTGTCTACTGAACAAGAAAGACAAACAACTCTCTCTGAACCTCAC  
AGCTGCCATCCTGGGGACTCAGCCGTGTAATCTGCGCAGTCAGTGGAGGTTTACGCTTAGGGAGGCTGCATT  
TTGGAGCTGGGACTCAGCTGATTGTCATACCTGACATCCAGAACCCAGAACCTGCTGTGTACCAGTTAAAAGAT

CCTCGGTCTCAGGACAGCACCCCTCTGCCTGTTACCGACTTTGACTCCCAAATCAATGTGCCGAAAACCATGGA  
ATCTGGAACGTTCACTACTGACAAAAGCTGTGCTGGACATGAAAGCTATGGATTCCAAGAGCAATGGGGCCATTG  
CCTGGAGCAACCAGACAAGCTTCACCTGCCAAGATATCTTCAAAGAGACCAACGCCACCTACCCCAGTTCAGAC  
GTTCCCTGTGATGCCACGTTGACTGAGAAAAGCTTTGAAACAGATATGAACCTAAACTTTCAAACCTGTCAGT  
TATGGGACTCCGAATCCTCCTGCTGAAAGTAGCCGGATTTAACCTGCTCATGACGCTGAGGCTGTGGTCCAGTT  
GAGGTCTGCAAGGATCC

2b) P25 TCRbeta sequence

ATGGCCCCCAGGCTCCTTTTCTGTCTGGTTCTTTGCTTCTTGAGAGCAGAACCAACAAATGCTGGTGTCATCCA  
AACACCTAGGCACAAGGTGACAGGGAAGGGACAAGAAGCAACTCTGTGGTGTGAGCCAATTTCAGGACATAGTG  
CTGTTTTCTGGTACAGACAGACCATTGTGCAGGGCCTGGAGTTCCTGACTTACTTTCGAAATCAAGTCCTATA  
GATGATTCAGGGATGCCAAGGAACGATTTCTCAGCTCAGATGCCAATCAGTCGCACTCAACTCTGAAGATCCA  
GAGCACGCAACCCAGGACTCAGCGGTGTATCTTTGTGCAAGCAGCTTCGAATCTAGTGCAGAAACGCTGTATT  
TTGGCTCAGGAACCAGACTGACTGTTCTCGAGGATCTGAGAAATGTGACTCCACCCAAGGTCTCCTTGTTTGAG  
CCATCAAAGCAGAGATTGCAAACAAACAAAGGCTACCCTCGTGTGCTTGGCCAGGGGCTTCTTCCCTGACCA  
CGTGGAGCTGAGCTGGTGGGTGAATGGCAAGGAGGTCCACAGTGGGGTCAGCACGGACCCTCAGGCCTACAAGG  
AGAGCAATTATAGCTACTGCCTGAGCAGCCGCCTGAGGGTCTCTGCTACCTTCTGGCACAATCCTCGAAACCAC  
TTCCGCTGCCAAGTGCAGTTCATGGGCTTTCAGAGGAGGACAAGTGGCCAGAGGGCTCACCCAAACCTGTCAC  
ACAGAACATCAGTGCAGAGGCCTGGGGCCGAGCAGACTGTGGAATCACTTCAGCATCCTATCATCAGGGGGTTC  
TGTCTGCAACCATCCTCTATGAGATCCTACTGGGGAAGGCCACCCTATATGCTGTGCTGGTCAGTGGCCTGGTG  
CTGATGGCCATGGTCAAGAAAAAAATTCCTGAGACAAACTTTTATGC

**Code:**

V region (single underline)

J region (double underline)

D region (turquoise highlight)

N or P region (yellow highlight)

**CDR3** (bold)

*C region* (italics)

Green highlight – difference from germline (supposed to be "T")
