# Supplementary material for: Vaccine-elicited memory CD4+ T cell expansion is impaired in the lungs during tuberculosis
Source: PubMed Central journal article supplement (PMC5720822; doi:10.1371/journal.ppat.1006704), 2017-11-27
Supplement: ppat.1006704.s006.pdf [file ppat.1006704.s006.pdf]

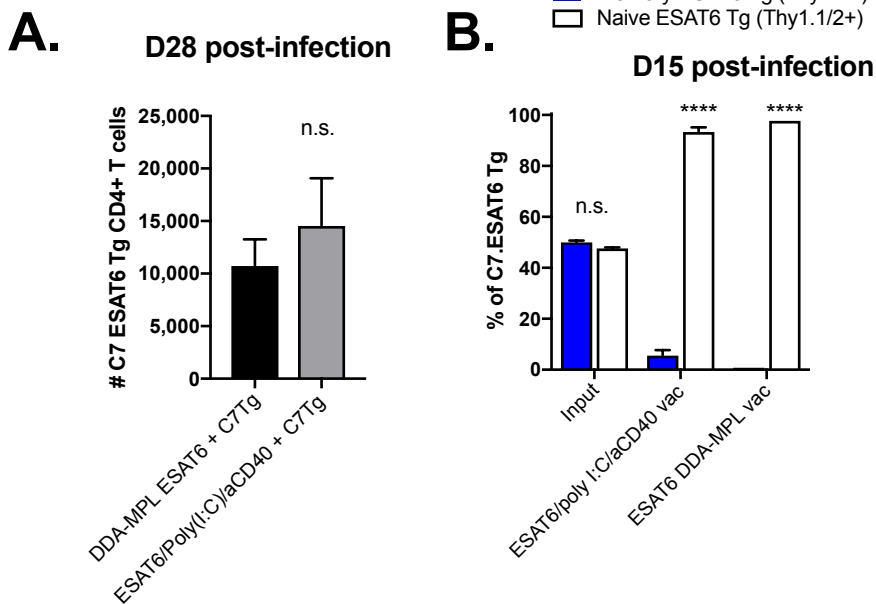

**Fig. S6: Memory TCR Tg CD4+ T cells specific for ESAT6 (C7) generated by ESAT6 + DDA-TDM-MPL or Poly(I:C)/aCD40 vaccination exhibit similar impaired expansion in the lung after aerosol Mtb challenge.** (a) Numbers of memory C7 cells in the lungs of separate groups of mice after adoptive transfer of C7 cells, vaccination with either DDA-TDM-MPL ESAT6 or Poly(I:C)/aCD40/ESAT6, and aerosol Mtb challenge 4 weeks earlier. (b) Proportions of memory vs. naive C7 cells at d15 post-infection, generated by either vaccine 12 weeks prior and co-transferred with naive C7 cells into the same mice. n.s. not significant, \*\*\*\* <0.0001.
